# Supplementary material for: Adolescent and Parent Perspectives on Digital Phenotyping in Youths With Chronic Pain: Cross-Sectional Mixed Methods Survey Study
Source: PubMed Central journal article supplement (PMC10811597; doi:10.2196/47781), 2024-01-11
Supplement: jmir_v26i1e47781_app1.pdf [file jmir_v26i1e47781_app1.pdf]

# Using Smartphone Sensors for Clinical Care and Research

Thank you for participating in this study!

We are conducting this research study to understand how adolescent patients with pain conditions and their parents feel and think about the use of data gathered from smartphones being used for clinical care and research purposes. For this purpose, we are asking you to fill out the following web survey, in which we'll collect some basic demographic information and assess your concerns and opinions on the utility of this technology.

Your opinion is very important to us. It will inform how we can best incorporate smartphones in an acceptable and useful fashion in our clinical research as well as in our assessment and treatment of adolescent pain patients. This survey will take approximately 30 minutes to complete. Please answer all the questions in one sitting. You will not be allowed to return to the survey if you exit early.

---

Survey date \_\_\_\_\_

**Demographic Questions**

Age

\_\_\_\_\_ (Years)

Are you:

- A mother
- A father
- A guardian
- A patient

What is your highest level of education?

- Some high school coursework completed, but did not graduate or complete a GED
- High school or equivalent: you've earned a high school diploma or a GED
- Associate degree (including occupational or academic degrees)
- Some college coursework completed, but haven't earned a degree
- Bachelor's degree: you've earned a four year degree (BS, BA, etc.)
- Master's degree: you've earned a master's level degree (MA, MS, MENG, MSW, MBA, etc.)
- Professional school or doctorate degree: you've earned a professional or doctorate level degree (MD, DDC, JD, PhD, EdD, etc.)
- Other

Please, specify the other education level

\_\_\_\_\_

---

**Familiarity with Technology Question**

---

How comfortable are you with technology?

- 1: Very uncomfortable
  - 2: Uncomfortable
  - 3: Somewhat comfortable
  - 4: Comfortable
  - 5: Very comfortable
- 

Your phone is:

- Android
  - iPhone
  - Windows phone
  - Other
  - I don't have a phone
- 

Which other phone? \_\_\_\_\_

---

Thank you for filling out the Demographic portion of the survey! Please click on "Submit" and begin the next portion of the survey.

# Adolescent Survey

Please complete the survey below.

Thank you!

## Introduction

There are multiple sensors built into every smartphone that can be used for many different purposes. In this survey, we would like to ask you about your opinion on having researchers and doctors use information gathered from these sensors in order to better understand how you are doing and treat you. Using short videos, we will explain what the sensors do and provide examples of how they could be used for your treatment and research about your condition. Please watch the videos and fill out the questions for each sensor. There will be a total of 9 sensors presented to you. They are grouped into 5 categories: Activity, Location, Social Activity, Sleep, and Phone Use.

We want to make it clear that we are only interested in your opinion on the usage of these sensors. Your answers to any of these questions will not result in any information being gathered about you. The only purpose of this survey is to understand how patients and their parents feel about the collection of information from phone sensors for treatment and research purposes, which is necessary in order to be able to design future studies in ways that are acceptable and ethical from a patients/parent's point of view.

**Activity Sensors: Accelerometer**

Please watch the video and fill out the questions below.

1. Overall how useful do you feel the information from this sensor will be in helping us understand how you are doing?

- 1: Not useful at all
- 2: A little useful
- 3: Somewhat useful
- 4: Useful
- 5: Very useful

2. Would you agree to have your daily activity levels based on this sensor shared with your doctor as part of your treatment plan?

- Yes
- No

3. Would you agree to have your daily activity levels based on this sensor shared with researchers for studies related to your pain condition?

- Yes
- No

5%

**4. Please indicate your level of agreement with the following concerns about using this sensor in your treatment plan and/or clinical research from "Strongly Disagree" to "Strongly Agree."**

|                                                                                   | Strongly disagree     | Disagree              | Neutral               | Agree                 | Strongly agree        |
|-----------------------------------------------------------------------------------|-----------------------|-----------------------|-----------------------|-----------------------|-----------------------|
| a I don't think this sensor would be useful for my treatment                      | <input type="radio"/> | <input type="radio"/> | <input type="radio"/> | <input type="radio"/> | <input type="radio"/> |
| b I don't want anyone to be able to see my activity levels                        | <input type="radio"/> | <input type="radio"/> | <input type="radio"/> | <input type="radio"/> | <input type="radio"/> |
| c I don't carry my phone with me all the time, so you might miss lots of activity | <input type="radio"/> | <input type="radio"/> | <input type="radio"/> | <input type="radio"/> | <input type="radio"/> |
| d I'm worried that my data might be seen by people other than my doctor           | <input type="radio"/> | <input type="radio"/> | <input type="radio"/> | <input type="radio"/> | <input type="radio"/> |

4.2. Do you have any other concerns that were not previously listed?  Yes  No

4.3. Please specify your other concern(s): \_\_\_\_\_

4.4. How strong is this concern?  Not concerning at all  A little concerning  Somewhat concerning  Concerning  Very concerning

5. Would you be ok with having your activity levels (accelerometer sensor) shared with your parents as part of your medical assessment?  Yes  No

6. Is there anything you think would be important for us to measure to understand your activity levels and how active you are? (Optional) \_\_\_\_\_

11% Complete

**Phone Use Sensors: Applications**

Please watch the video and fill out the questions below.

1. Overall, how useful do you feel the information from this sensor will be in helping us understand how you are doing?

- 1: Not useful at all
- 2: A little useful
- 3: Somewhat useful
- 4: Useful
- 5: Very useful

2. Would you agree to this information being shared with your doctor as part of your treatment plan?

- Yes
- No

3. Would you agree to this information being shared with researchers for studies related to your pain condition?

- Yes
- No

16% Complete



**4. Please indicate your level of agreement with the following concerns about using this sensor in your treatment plan and/or clinical research from "Strongly Disagree" to "Strongly Agree."**

|                                                                                                                                                     | Strongly disagree     | Disagree              | Neutral               | Agree                 | Strongly agree        |
|-----------------------------------------------------------------------------------------------------------------------------------------------------|-----------------------|-----------------------|-----------------------|-----------------------|-----------------------|
| a I don't think this sensor is useful in treatment                                                                                                  | <input type="radio"/> | <input type="radio"/> | <input type="radio"/> | <input type="radio"/> | <input type="radio"/> |
| b I only use my phone to make calls or send and receive text messages, I don't use apps                                                             | <input type="radio"/> | <input type="radio"/> | <input type="radio"/> | <input type="radio"/> | <input type="radio"/> |
| c I use a lot of apps at the same time and leave them open in the background. The information about time spent on each app might therefore be wrong | <input type="radio"/> | <input type="radio"/> | <input type="radio"/> | <input type="radio"/> | <input type="radio"/> |
| d I don't feel comfortable with my doctor knowing what apps I use                                                                                   | <input type="radio"/> | <input type="radio"/> | <input type="radio"/> | <input type="radio"/> | <input type="radio"/> |
| e I don't feel comfortable with my doctor knowing how long I use each app                                                                           | <input type="radio"/> | <input type="radio"/> | <input type="radio"/> | <input type="radio"/> | <input type="radio"/> |

4.2. Do you have any other concerns that were not previously listed?  Yes  No

4.3. Please specify your other concern(s): \_\_\_\_\_

4.4. How strong is this concern?  1: Not concerning at all  2: A little concerning  3: Neutral  4: Concerning  5: Very concerning

5. Would you be ok with having your phone usage (applications sensor) shared with your parents as part of your medical assessment?  Yes  No

6. Is there anything you think would be important for us to measure to understand your phone usage? (Optional) \_\_\_\_\_

22% Complete

**Social Activity Sensors: Bluetooth**

Please watch the video and fill out the questions below.

---

1. Overall, how useful do you feel the information from this sensor will be in helping us understand how you are doing?

- 1: Not useful at all  
 2: A little useful  
 3: Somewhat useful  
 4: Useful  
 5: Very useful

---

2. Would you agree to this information being shared with your doctor as part of your treatment plan?

- Yes  
 No

---

3. Would you agree to this information being shared with researchers for studies related to your pain condition?

- Yes  
 No
- 

27% Complete

**4. Please indicate your level of agreement with the following concerns about using this sensor in your treatment plan and/or clinical research from "Strongly Disagree" to "Strongly Agree."**

|                                                                                 | Strongly disagree     | Disagree              | Neutral               | Agree                 | Strongly agree        |
|---------------------------------------------------------------------------------|-----------------------|-----------------------|-----------------------|-----------------------|-----------------------|
| a I don't think this sensor is useful in treatment                              | <input type="radio"/> | <input type="radio"/> | <input type="radio"/> | <input type="radio"/> | <input type="radio"/> |
| b I don't carry my phone with me all the time, so the measure won't be accurate | <input type="radio"/> | <input type="radio"/> | <input type="radio"/> | <input type="radio"/> | <input type="radio"/> |
| c I keep my Bluetooth turned off                                                | <input type="radio"/> | <input type="radio"/> | <input type="radio"/> | <input type="radio"/> | <input type="radio"/> |
| d I don't want my doctor to know who I spend time with                          | <input type="radio"/> | <input type="radio"/> | <input type="radio"/> | <input type="radio"/> | <input type="radio"/> |
| e I am worried that my data might be seen by people other than my doctor        | <input type="radio"/> | <input type="radio"/> | <input type="radio"/> | <input type="radio"/> | <input type="radio"/> |

4.2. Do you have any other concerns that were not previously listed?  Yes  No

4.3. Please specify your other concern(s): \_\_\_\_\_

4.4. How strong is this concern?  1: Not concerning at all  2: A little concerning  3: Neutral  4: Concerning  5: Very concerning

33% Complete

**Social Activity Sensors: Text Messages and Call Log**

Please watch the video and fill out the questions below.

---

1. Overall, how useful do you feel the information from this sensor will be in helping us understand how you are doing?

- 1: Not useful at all  
 2: A little useful  
 3: Somewhat useful  
 4: Useful  
 5: Very useful

---

2. Would you agree to this information being shared with your doctor as part of your treatment plan?

- Yes  
 No

---

3. Would you agree to this information being shared with researchers for studies related to your pain condition?

- Yes  
 No

---

38% Complete

**Text Message and Call Log**

**4. Please indicate your level of agreement with the following concerns about using this sensor in your treatment plan and/or clinical research from "Strongly Disagree" to "Strongly Agree."**

|                                                                                  | Strongly disagree     | Disagree              | Neutral               | Agree                 | Strongly agree        |
|----------------------------------------------------------------------------------|-----------------------|-----------------------|-----------------------|-----------------------|-----------------------|
| I don't think this sensor is useful in treatment                                 | <input type="radio"/> | <input type="radio"/> | <input type="radio"/> | <input type="radio"/> | <input type="radio"/> |
| I don't use text messages; I use other apps to communicate                       | <input type="radio"/> | <input type="radio"/> | <input type="radio"/> | <input type="radio"/> | <input type="radio"/> |
| I use other apps to call people                                                  | <input type="radio"/> | <input type="radio"/> | <input type="radio"/> | <input type="radio"/> | <input type="radio"/> |
| I don't call people very often, so this measure would not be useful in treatment | <input type="radio"/> | <input type="radio"/> | <input type="radio"/> | <input type="radio"/> | <input type="radio"/> |
| I don't feel comfortable with my doctor having this information                  | <input type="radio"/> | <input type="radio"/> | <input type="radio"/> | <input type="radio"/> | <input type="radio"/> |

4.2. Do you have any other concerns that were not previously listed?

- Yes
- No

4.3. Please specify your other concern(s):

\_\_\_\_\_

4.4. How strong is this concern?

- 1: Not concerning at all
- 2: A little concerning
- 3: Neutral
- 4: Concerning
- 5: Very concerning

44% Complete

**Social Activity Sensors: Keyboard**

Please watch the video and fill out the questions below.

---

1. Overall, how useful do you feel the information from this sensor will be in helping us understand how you are doing?

- 1: Not useful at all  
 2: A little useful  
 3: Somewhat useful  
 4: Useful  
 5: Very useful

---

2. Would you agree to this information being shared with your doctor as part of your treatment plan?

- Yes  
 No

---

3. Would you agree to this information being shared with researchers for studies related to your pain condition?

- Yes  
 No
- 

50% Complete

**4. Please indicate your level of agreement with the following concerns about using this sensor in your treatment plan and/or clinical research from "Strongly Disagree" to "Strongly Agree."**

|                                                                                | Strongly disagree     | Disagree              | Neutral               | Agree                 | Strongly agree        |
|--------------------------------------------------------------------------------|-----------------------|-----------------------|-----------------------|-----------------------|-----------------------|
| I don't think this sensor is useful in treatment                               | <input type="radio"/> | <input type="radio"/> | <input type="radio"/> | <input type="radio"/> | <input type="radio"/> |
| I wouldn't want this information to be shared with my parents                  | <input type="radio"/> | <input type="radio"/> | <input type="radio"/> | <input type="radio"/> | <input type="radio"/> |
| I am not comfortable with having my doctor potentially know what I type        | <input type="radio"/> | <input type="radio"/> | <input type="radio"/> | <input type="radio"/> | <input type="radio"/> |
| I use voice dictation to type, so this measure wouldn't be useful in treatment | <input type="radio"/> | <input type="radio"/> | <input type="radio"/> | <input type="radio"/> | <input type="radio"/> |
| I am worried that my data might be seen by people other than my doctor         | <input type="radio"/> | <input type="radio"/> | <input type="radio"/> | <input type="radio"/> | <input type="radio"/> |

4.2. Do you have any other concerns that were not previously listed?

- Yes  
 No

4.3. Please specify your other concern(s):

\_\_\_\_\_

4.4. How strong is this concern?

- 1: Not concerning at all  
 2: A little concerning  
 3: Neutral  
 4: Concerning  
 5: Very concerning

5. If we were to look at your keyboard use in order to analyze your typing speed and deleted all the keyboard data daily, would you feel comfortable about having this information used in your health care?

- Yes  
 No

55% Complete

**Social Activity Sensors: Voice**

Please watch the video and fill out the questions below.

---

1. Overall, how useful do you feel the information from this sensor will be in helping us understand how you are doing?

- 1: Not useful at all  
 2: A little useful  
 3: Somewhat useful  
 4: Useful  
 5: Very useful

---

2. Would you agree to this information being shared with your doctor as part of your treatment plan?

- Yes  
 No

---

3. Would you agree to this information being shared with researchers for studies related to your pain condition?

- Yes  
 No
- 

61% Complete



**4. Please indicate your level of agreement with the following concerns about using this sensor in your treatment plan and/or clinical research from "Strongly Disagree" to "Strongly Agree."**

|                                                                                                                         | Strongly disagree     | Disagree              | Neutral               | Agree                 | Strongly agree        |
|-------------------------------------------------------------------------------------------------------------------------|-----------------------|-----------------------|-----------------------|-----------------------|-----------------------|
| I don't think this sensor is useful in treatment                                                                        | <input type="radio"/> | <input type="radio"/> | <input type="radio"/> | <input type="radio"/> | <input type="radio"/> |
| I am not comfortable with my phone picking up everything I say in close proximity, even if it can be used for treatment | <input type="radio"/> | <input type="radio"/> | <input type="radio"/> | <input type="radio"/> | <input type="radio"/> |
| I use a lot of slang words. It might be difficult for the artificial intelligence to capture what I am saying           | <input type="radio"/> | <input type="radio"/> | <input type="radio"/> | <input type="radio"/> | <input type="radio"/> |
| I often have my phone in my pocket or bag, so it might be difficult for the sensor to pick up what I say                | <input type="radio"/> | <input type="radio"/> | <input type="radio"/> | <input type="radio"/> | <input type="radio"/> |
| I am not comfortable with my doctor having this information                                                             | <input type="radio"/> | <input type="radio"/> | <input type="radio"/> | <input type="radio"/> | <input type="radio"/> |

4.2. Do you have any other concerns that were not previously listed?

- Yes  
 No

4.3. Please specify your other concern(s):

\_\_\_\_\_

4.4. How strong is this concern?

- 1: Not concerning at all  
 2: A little concerning  
 3: Neutral  
 4: Concerning  
 5: Very concerning

5. If we were to analyze characteristics of your voice, such as loudness and speaking rate and then deleted the voice data daily, would you feel comfortable about having this information used in your health care?

- Yes  
 No

6. Would you be ok with having your social activity (bluetooth, text message and call log, keyboard, and voice sensors) shared with your parents as part of your medical assessment?

- Yes  
 No

7. Is there anything you think would be important for us to measure to understand your social activity? (Optional)

\_\_\_\_\_

66% Complete

**Sleep Sensors: Light**

Please watch the video and fill out the questions below.

---

1. Overall, how useful do you feel the information from this sensor will be in helping us understand how you are doing?

- 1: Not useful at all  
 2: A little useful  
 3: Somewhat useful  
 4: Useful  
 5: Very useful

---

2. Would you agree to this information being shared with your doctor as part of your treatment plan?

- Yes  
 No

---

3. Would you agree to this information being shared with researchers for studies related to your pain condition?

- Yes  
 No

---

71% Complete

**4. Please indicate your level of agreement with the following concerns about using this sensor in your treatment plan and/or clinical research from "Strongly Disagree" to "Strongly Agree."**

|                                                                                                                     | Strongly disagree     | Disagree              | Neutral               | Agree                 | Strongly agree        |
|---------------------------------------------------------------------------------------------------------------------|-----------------------|-----------------------|-----------------------|-----------------------|-----------------------|
| a I don't think this sensor is useful in treatment                                                                  | <input type="radio"/> | <input type="radio"/> | <input type="radio"/> | <input type="radio"/> | <input type="radio"/> |
| b I don't carry my phone with me all the time, so the measure won't be accurate                                     | <input type="radio"/> | <input type="radio"/> | <input type="radio"/> | <input type="radio"/> | <input type="radio"/> |
| c I carry my phone in my pocket or in my bag, so I am not sure if this measure will be accurate                     | <input type="radio"/> | <input type="radio"/> | <input type="radio"/> | <input type="radio"/> | <input type="radio"/> |
| d I turn my phone off at night, so I am not sure this measure will gather the information you want                  | <input type="radio"/> | <input type="radio"/> | <input type="radio"/> | <input type="radio"/> | <input type="radio"/> |
| e I turn my phone off when I don't feel well, so I am not sure if this measure will be helpful in my treatment plan | <input type="radio"/> | <input type="radio"/> | <input type="radio"/> | <input type="radio"/> | <input type="radio"/> |

4.2. Do you have any other concerns that were not previously listed?

- Yes  
 No

4.3. Please specify your other concern(s):

\_\_\_\_\_

4.4. How strong is this concern?

- 1: Not concerning at all  
 2: A little concerning  
 3: Neutral  
 4: Concerning  
 5: Very concerning

77% Complete

**Sleep Sensors: Screen**

Please watch the video and fill out the questions below.

---

1. Overall, how useful do you feel the information from this sensor will be in helping us understand how you are doing?

- 1: Not useful at all  
 2: A little useful  
 3: Somewhat useful  
 4: Useful  
 5: Very useful

---

2. Would you agree to this information being shared with your doctor as part of your treatment plan?

- Yes  
 No

---

3. Would you agree to this information being shared with researchers for studies related to your pain condition?

- Yes  
 No
- 

82% Complete

**4. Please indicate your level of agreement with the following concerns about using this sensor in your treatment plan and/or clinical research from "Strongly Disagree" to "Strongly Agree."**

|                                                                     | Strongly disagree     | Disagree              | Neutral               | Agree                 | Strongly agree        |
|---------------------------------------------------------------------|-----------------------|-----------------------|-----------------------|-----------------------|-----------------------|
| I don't think this sensor is useful in treatment                    | <input type="radio"/> | <input type="radio"/> | <input type="radio"/> | <input type="radio"/> | <input type="radio"/> |
| I wouldn't want people to know when I use my phone during the day   | <input type="radio"/> | <input type="radio"/> | <input type="radio"/> | <input type="radio"/> | <input type="radio"/> |
| I wouldn't want people to know when I use my phone during the night | <input type="radio"/> | <input type="radio"/> | <input type="radio"/> | <input type="radio"/> | <input type="radio"/> |
| I don't use my phone at night, so the measure won't be accurate     | <input type="radio"/> | <input type="radio"/> | <input type="radio"/> | <input type="radio"/> | <input type="radio"/> |
| I don't feel comfortable with my doctor having this information     | <input type="radio"/> | <input type="radio"/> | <input type="radio"/> | <input type="radio"/> | <input type="radio"/> |

4.2. Do you have any other concerns that were not previously listed?

- Yes  
 No

4.3. Please specify your other concern(s):

\_\_\_\_\_

4.4. How strong is this concern?

- 1: Not concerning at all  
 2: A little concerning  
 3: Neutral  
 4: Concerning  
 5: Very concerning

5. Would you be ok with having your sleep information (light and screen sensors) shared with your parents as part of your medical assessment?

- Yes  
 No

6. Is there anything you think would be important for us to measure to understand your sleep? (Optional)

\_\_\_\_\_

88% Complete

**Location Sensors: GPS**

Please watch the video and fill out the questions below.

---

1. Overall, how useful do you feel the information from this sensor will be in helping us understand how you are doing?

- 1: Not useful at all  
 2: A little useful  
 3: Somewhat useful  
 4: Useful  
 5: Very useful

---

2. Would you agree to this information being shared with your doctor as part of your treatment plan?

- Yes  
 No

---

3. Would you agree to this information being shared with researchers for studies related to your pain condition?

- Yes  
 No
- 

93% Complete

**4. Please indicate your level of agreement with the following concerns about using this sensor in your treatment plan and/or clinical research from "Strongly Disagree" to "Strongly Agree."**

|                                                                                       | Strongly disagree     | Disagree              | Neutral               | Agree                 | Strongly agree        |
|---------------------------------------------------------------------------------------|-----------------------|-----------------------|-----------------------|-----------------------|-----------------------|
| I don't think this sensor is useful in treatment                                      | <input type="radio"/> | <input type="radio"/> | <input type="radio"/> | <input type="radio"/> | <input type="radio"/> |
| When I leave home, I don't usually carry my phone with me                             | <input type="radio"/> | <input type="radio"/> | <input type="radio"/> | <input type="radio"/> | <input type="radio"/> |
| I am not comfortable about the clinician knowing where I spend my time during the day | <input type="radio"/> | <input type="radio"/> | <input type="radio"/> | <input type="radio"/> | <input type="radio"/> |
| I am worried that my data might be seen by people other than my doctor                | <input type="radio"/> | <input type="radio"/> | <input type="radio"/> | <input type="radio"/> | <input type="radio"/> |
| I turn my phone off at times during the day, so this measure would not be helpful     | <input type="radio"/> | <input type="radio"/> | <input type="radio"/> | <input type="radio"/> | <input type="radio"/> |

4.2. Do you have any other concerns that were not previously listed?

- Yes  
 No

4.3. Please specify your other concern(s):

\_\_\_\_\_

4.4. How strong is this concern?

- 1: Not concerning at all  
 2: A little concerning  
 3: Neutral  
 4: Concerning  
 5: Very concerning

5. If we use your GPS data to tell us how much time you spend at select places of interest, such as home and school and then delete it daily, would you feel comfortable about having this information used in your health care?

- Yes  
 No

6. If your phone was to provide transformed GPS data, which would not show exactly where you are but could let us know how much time you spend at various locations during the day and how much you move around, would you feel comfortable about having this information used in your health care?

- Yes  
 No

7. Would you be ok with having where you spend time (GPS sensor) shared with your parents as part of your medical assessment?

- Yes  
 No

8. Is there anything you think would be important for us to measure to understand your location? (Optional)

\_\_\_\_\_

100% Complete

# Parent Survey

Please complete the survey below.

Thank you!



## Introduction

There are multiple sensors built into every smartphone that can be used for many different purposes. In this survey, we would like to ask you about your opinion on having researchers and doctors use information gathered from these sensors in order to better understand how your child is doing. Using short videos, we will explain what the sensors do and provide examples of how they could be used for your child's treatment and research about your child's condition. Please watch the videos and fill out the questions for each sensor. There will be a total of 9 sensors presented to you. They are grouped into 5 categories: Activity, Location, Social Activity, Sleep, and Phone Use.

We want to make it clear that we are only interested in your opinion on the usage of these sensors. Your answers to any of these questions will not result in any information being gathered about you. The only purpose of this survey is to understand how patients and their parents feel about the collection of information from phone sensors for treatment and research purposes, which is necessary in order to be able to design future studies in ways that are acceptable and ethical from a patients/parent's point of view.

**Activity Sensors: Accelerometer**

Please watch the video and fill out the questions below.

---

1. Overall how useful do you feel the information from this sensor will be in helping us understand how your child is doing?

- 1: Not useful at all  
 2: A little useful  
 3: Somewhat useful  
 4: Useful  
 5: Very useful

---

2. Would you agree to have your child's daily activity levels based on this sensor shared with your child's doctor as part of their treatment plan?

- Yes  
 No

---

3. Would you agree to have your child's daily activity levels based on this sensor shared with researchers for studies related to your child's pain condition?

- Yes  
 No

---

5%

**4. Please indicate your level of agreement with the following concerns about using this sensor in your child's treatment plan and/or clinical research from "Strongly Disagree" to "Strongly Agree."**

|                                                                                                 | Strongly disagree     | Disagree              | Neutral               | Agree                 | Strongly agree        |
|-------------------------------------------------------------------------------------------------|-----------------------|-----------------------|-----------------------|-----------------------|-----------------------|
| a I don't think this sensor would be useful for my child's treatment                            | <input type="radio"/> | <input type="radio"/> | <input type="radio"/> | <input type="radio"/> | <input type="radio"/> |
| b I don't want anyone to be able to see my child's activity levels                              | <input type="radio"/> | <input type="radio"/> | <input type="radio"/> | <input type="radio"/> | <input type="radio"/> |
| c My child doesn't carry their phone with them all the time, so you might miss lots of activity | <input type="radio"/> | <input type="radio"/> | <input type="radio"/> | <input type="radio"/> | <input type="radio"/> |
| d I'm worried that my child's data might be seen by people other than my child's doctor         | <input type="radio"/> | <input type="radio"/> | <input type="radio"/> | <input type="radio"/> | <input type="radio"/> |

4.2. Do you have any other concerns that were not previously listed?

- Yes  
 No

4.3. Please specify your other concern(s):

\_\_\_\_\_

4.4. How strong is this concern?

- 1: Not concerning at all  
 2: A little concerning  
 3: Neutral  
 4: Concerning  
 5: Very concerning

5. Is there anything you think would be important for us to measure to understand your child's activity levels (accelerometer sensor) and how active they are? (Optional)

\_\_\_\_\_

11% Complete

## Phone Usage Sensors: Applications

Please watch the video and fill out the questions below.

---

1. Overall, how useful do you feel the information from this sensor will be in helping us understand how your child is doing?

- 1: Not useful at all  
 2: A little useful  
 3: Somewhat useful  
 4: Useful  
 5: Very useful

---

2. Would you agree to this information being shared with your child's doctor as part of your child's treatment plan?

- Yes  
 No

---

3. Would you agree to this information being shared with researchers for studies related to your child's pain condition?

- Yes  
 No
- 

16% Complete

**4. Please indicate your level of agreement with the following concerns about using this sensor in your child's treatment plan and/or clinical research from "Strongly Disagree" to "Strongly Agree."**

|                                                                                                                                                              | Strongly disagree     | Disagree              | Neutral               | Agree                 | Strongly agree        |
|--------------------------------------------------------------------------------------------------------------------------------------------------------------|-----------------------|-----------------------|-----------------------|-----------------------|-----------------------|
| a I don't think this sensor is useful in treatment                                                                                                           | <input type="radio"/> | <input type="radio"/> | <input type="radio"/> | <input type="radio"/> | <input type="radio"/> |
| b My child only uses their phone to make calls or send and receive text messages, they don't use apps                                                        | <input type="radio"/> | <input type="radio"/> | <input type="radio"/> | <input type="radio"/> | <input type="radio"/> |
| c My child uses a lot of apps at the same time and leaves them open in the background. The information about time spent on each app might therefore be wrong | <input type="radio"/> | <input type="radio"/> | <input type="radio"/> | <input type="radio"/> | <input type="radio"/> |
| d I don't feel comfortable with my child's doctor knowing what apps my child uses                                                                            | <input type="radio"/> | <input type="radio"/> | <input type="radio"/> | <input type="radio"/> | <input type="radio"/> |
| e I don't feel comfortable with my child's doctor knowing how long my child uses each app                                                                    | <input type="radio"/> | <input type="radio"/> | <input type="radio"/> | <input type="radio"/> | <input type="radio"/> |

4.2. Do you have any other concerns that were not previously listed?  Yes  No

4.3. Please specify your other concern(s): \_\_\_\_\_

4.4. How strong is this concern?  1: Not concerning at all  2: A little concerning  3: Neutral  4: Concerning  5: Very concerning

5. Is there anything you think would be important for us to measure to understand your child's phone usage (applications sensor)? (Optional) \_\_\_\_\_

22% Complete

**Social Activity Sensors: Bluetooth**

Please watch the video and fill out the questions below.

---

1. Overall, how useful do you feel the information from this sensor will be in helping us understand how your child is doing?

- 1: Not useful at all  
 2: A little useful  
 3: Somewhat useful  
 4: Useful  
 5: Very useful

---

2. Would you agree to this information being shared with your child's doctor as part of your child's treatment plan?

- Yes  
 No

---

3. Would you agree to this information being shared with researchers for studies related to your child's pain condition?

- Yes  
 No

---

27% Complete

**4. Please indicate your level of agreement with the following concerns about using this sensor in your child's treatment plan and/or clinical research from "Strongly Disagree" to "Strongly Agree."**

|                                                                                               | Strongly disagree     | Disagree              | Neutral               | Agree                 | Strongly agree        |
|-----------------------------------------------------------------------------------------------|-----------------------|-----------------------|-----------------------|-----------------------|-----------------------|
| a I don't think this sensor is useful in treatment                                            | <input type="radio"/> | <input type="radio"/> | <input type="radio"/> | <input type="radio"/> | <input type="radio"/> |
| b My child doesn't carry their phone with them all the time, so the measure won't be accurate | <input type="radio"/> | <input type="radio"/> | <input type="radio"/> | <input type="radio"/> | <input type="radio"/> |
| c My child keeps their Bluetooth turned off                                                   | <input type="radio"/> | <input type="radio"/> | <input type="radio"/> | <input type="radio"/> | <input type="radio"/> |
| d I don't want my child's doctor to know who they spend time with                             | <input type="radio"/> | <input type="radio"/> | <input type="radio"/> | <input type="radio"/> | <input type="radio"/> |
| e I am worried that my child's data might be seen by people other than my child's doctor      | <input type="radio"/> | <input type="radio"/> | <input type="radio"/> | <input type="radio"/> | <input type="radio"/> |

4.2. Do you have any other concerns that were not previously listed?

- Yes  
 No

4.3. Please specify your other concern(s):

---

4.4. How strong is this concern?

- 1: Not concerning at all  
 2: A little concerning  
 3: Neutral  
 4: Concerning  
 5: Very concerning

33% Complete

**Social Activity Sensors: Text Messages and Call Log**

Please watch the video and fill out the questions below.

---

1. Overall, how useful do you feel the information from this sensor will be in helping us understand how your child is doing?

- 1: Not useful at all  
 2: A little useful  
 3: Somewhat useful  
 4: Useful  
 5: Very useful

---

2. Would you agree to this information being shared with your child's doctor as part of your child's treatment plan?

- Yes  
 No

---

3. Would you agree to this information being shared with researchers for studies related to your child's pain condition?

- Yes  
 No
- 

38% Complete



**4. Please indicate your level of agreement with the following concerns about using this sensor in your child's treatment plan and/or clinical research from "Strongly Disagree" to "Strongly Agree."**

|                                                                                           | Strongly disagree     | Disagree              | Neutral               | Agree                 | Strongly agree        |
|-------------------------------------------------------------------------------------------|-----------------------|-----------------------|-----------------------|-----------------------|-----------------------|
| I don't think this sensor is useful in treatment                                          | <input type="radio"/> | <input type="radio"/> | <input type="radio"/> | <input type="radio"/> | <input type="radio"/> |
| My child doesn't use text messages; they use other apps to communicate                    | <input type="radio"/> | <input type="radio"/> | <input type="radio"/> | <input type="radio"/> | <input type="radio"/> |
| My child uses other apps to call people                                                   | <input type="radio"/> | <input type="radio"/> | <input type="radio"/> | <input type="radio"/> | <input type="radio"/> |
| My child doesn't call people very often, so this measure would not be useful in treatment | <input type="radio"/> | <input type="radio"/> | <input type="radio"/> | <input type="radio"/> | <input type="radio"/> |
| I don't feel comfortable with my child's doctor having this information                   | <input type="radio"/> | <input type="radio"/> | <input type="radio"/> | <input type="radio"/> | <input type="radio"/> |

4.2. Do you have any other concerns that were not previously listed?  Yes  No

4.3. Please specify your other concern(s): \_\_\_\_\_

4.4. How strong is this concern?  1: Not concerning at all  2: A little concerning  3: Neutral  4: Concerning  5: Very concerning

44% Complete

**Social Activity Sensors: Keyboard**

Please watch the video and fill out the questions below.

---

1. Overall, how useful do you feel the information from this sensor will be in helping us understand how your child is doing?

- 1: Not useful at all  
 2: A little useful  
 3: Somewhat useful  
 4: Useful  
 5: Very useful

---

2. Would you agree to this information being shared with your child's doctor as part of your child's treatment plan?

- Yes  
 No

---

3. Would you agree to this information being shared with researchers for studies related to your child's pain condition?

- Yes  
 No

---

50% Complete

**4. Please indicate your level of agreement with the following concerns about using this sensor in your child's treatment plan and/or clinical research from "Strongly Disagree" to "Strongly Agree."**

|                                                                                        | Strongly disagree     | Disagree              | Neutral               | Agree                 | Strongly agree        |
|----------------------------------------------------------------------------------------|-----------------------|-----------------------|-----------------------|-----------------------|-----------------------|
| I don't think this sensor is useful in treatment                                       | <input type="radio"/> | <input type="radio"/> | <input type="radio"/> | <input type="radio"/> | <input type="radio"/> |
| My child wouldn't want this information to be shared with their parents                | <input type="radio"/> | <input type="radio"/> | <input type="radio"/> | <input type="radio"/> | <input type="radio"/> |
| I am not comfortable with having my child's doctor potentially know what I type        | <input type="radio"/> | <input type="radio"/> | <input type="radio"/> | <input type="radio"/> | <input type="radio"/> |
| My child uses voice dictation to type, so this measure wouldn't be useful in treatment | <input type="radio"/> | <input type="radio"/> | <input type="radio"/> | <input type="radio"/> | <input type="radio"/> |
| I am worried that my child's data might be seen by people other than my child's doctor | <input type="radio"/> | <input type="radio"/> | <input type="radio"/> | <input type="radio"/> | <input type="radio"/> |

4.2. Do you have any other concerns that were not previously listed?

- Yes  
 No

4.3. Please specify your other concern(s):

---

4.4. How strong is this concern?

- 1: Not concerning at all  
 2: A little concerning  
 3: Neutral  
 4: Concerning  
 5: Very concerning

5. If we were to look at your child's keyboard use in order to analyze their typing speed and deleted all the keyboard data daily, would you feel comfortable about having this information used in your child's health care?

- Yes  
 No

55% Complete

**Social Activity Sensors: Voice**

Please watch the video and fill out the questions below.

---

1. Overall, how useful do you feel the information from this sensor will be in helping us understand how your child is doing?

- 1: Not useful at all  
 2: A little useful  
 3: Somewhat useful  
 4: Useful  
 5: Very useful

---

2. Would you agree to this information being shared with your child's doctor as part of your child's treatment plan?

- Yes  
 No

---

3. Would you agree to this information being shared with researchers for studies related to your child's pain condition?

- Yes  
 No
- 

60% Complete

**4. Please indicate your level of agreement with the following concerns about using this sensor in your child's treatment plan and/or clinical research from "Strongly Disagree" to "Strongly Agree."**

|                                                                                                                                    | Strongly disagree     | Disagree              | Neutral               | Agree                 | Strongly agree        |
|------------------------------------------------------------------------------------------------------------------------------------|-----------------------|-----------------------|-----------------------|-----------------------|-----------------------|
| I don't think this sensor is useful in treatment                                                                                   | <input type="radio"/> | <input type="radio"/> | <input type="radio"/> | <input type="radio"/> | <input type="radio"/> |
| I am not comfortable with my child's phone picking up everything they say in close proximity, even if it can be used for treatment | <input type="radio"/> | <input type="radio"/> | <input type="radio"/> | <input type="radio"/> | <input type="radio"/> |
| My child uses a lot of slang words. It might be difficult for the artificial intelligence to capture what they are saying          | <input type="radio"/> | <input type="radio"/> | <input type="radio"/> | <input type="radio"/> | <input type="radio"/> |
| My child often has their phone in their pocket or bag, so it might be difficult for the sensor to pick up what they say            | <input type="radio"/> | <input type="radio"/> | <input type="radio"/> | <input type="radio"/> | <input type="radio"/> |
| I am not comfortable with my child's doctor having this information                                                                | <input type="radio"/> | <input type="radio"/> | <input type="radio"/> | <input type="radio"/> | <input type="radio"/> |

4.2. Do you have any other concerns that were not previously listed?

- Yes  
 No

4.3. Please specify your other concern(s):

\_\_\_\_\_

4.4. How strong is this concern?

- 1: Not concerning at all  
 2: A little concerning  
 3: Neutral  
 4: Concerning  
 5: Very concerning

5. If we were to analyze characteristics of your child's voice, such as loudness and speaking rate and then deleted the voice data daily, would you feel comfortable about having this information used in your child's health care?

- Yes  
 No

6. Is there anything you think would be important for us to measure to understand your child's social activity (bluetooth, text messages and call log, keyboard, and voice sensors)? (Optional)

\_\_\_\_\_

66% Complete

**Screen Sensors: Light**

Please watch the video and fill out the questions below.

---

1. Overall, how useful do you feel the information from this sensor will be in helping us understand how your child is doing?

- 1: Not useful at all  
 2: A little useful  
 3: Somewhat useful  
 4: Useful  
 5: Very useful

---

2. Would you agree to this information being shared with your child's doctor as part of your child's treatment plan?

- Yes  
 No

---

3. Would you agree to this information being shared with researchers for studies related to your child's pain condition?

- Yes  
 No
- 

71% Complete

**4. Please indicate your level of agreement with the following concerns about using this sensor in your child's treatment plan and/or clinical research from "Strongly Disagree" to "Strongly Agree."**

|                                                                                                                                           | Strongly disagree     | Disagree              | Neutral               | Agree                 | Strongly agree        |
|-------------------------------------------------------------------------------------------------------------------------------------------|-----------------------|-----------------------|-----------------------|-----------------------|-----------------------|
| a I don't think this sensor is useful in treatment                                                                                        | <input type="radio"/> | <input type="radio"/> | <input type="radio"/> | <input type="radio"/> | <input type="radio"/> |
| b My child doesn't carry their phone with them all the time, so the measure won't be accurate                                             | <input type="radio"/> | <input type="radio"/> | <input type="radio"/> | <input type="radio"/> | <input type="radio"/> |
| c My child carries their phone in their pocket or in their bag, so I am not sure if this measure will be accurate                         | <input type="radio"/> | <input type="radio"/> | <input type="radio"/> | <input type="radio"/> | <input type="radio"/> |
| d My child turns their phone off at night, so I am not sure this measure will gather the information you want                             | <input type="radio"/> | <input type="radio"/> | <input type="radio"/> | <input type="radio"/> | <input type="radio"/> |
| e My child turns their phone off when they don't feel well, so I am not sure if this measure will be helpful in my child's treatment plan | <input type="radio"/> | <input type="radio"/> | <input type="radio"/> | <input type="radio"/> | <input type="radio"/> |

4.2. Do you have any other concerns that were not previously listed?

- Yes
- No

4.3. Please specify your other concern(s):

\_\_\_\_\_

4.4. How strong is this concern?

- 1: Not concerning at all
- 2: A little concerning
- 3: Neutral
- 4: Concerning
- 5: Very concerning

77% Complete

**Sleep Sensors: Screen**

Please watch the video and fill out the questions below.

---

1. Overall, how useful do you feel the information from this sensor will be in helping us understand how your child is doing?

- 1: Not useful at all  
 2: A little useful  
 3: Somewhat useful  
 4: Useful  
 5: Very useful

---

2. Would you agree to this information being shared with your child's doctor as part of your child's treatment plan?

- Yes  
 No

---

3. Would you agree to this information being shared with researchers for studies related to your child's pain condition?

- Yes  
 No
- 

82% Complete



**4. Please indicate your level of agreement with the following concerns about using this sensor in your child's treatment plan and/or clinical research from "Strongly Disagree" to "Strongly Agree."**

|                                                                                | Strongly disagree     | Disagree              | Neutral               | Agree                 | Strongly agree        |
|--------------------------------------------------------------------------------|-----------------------|-----------------------|-----------------------|-----------------------|-----------------------|
| I don't think this sensor is useful in treatment                               | <input type="radio"/> | <input type="radio"/> | <input type="radio"/> | <input type="radio"/> | <input type="radio"/> |
| I wouldn't want people to know when my child uses their phone during the day   | <input type="radio"/> | <input type="radio"/> | <input type="radio"/> | <input type="radio"/> | <input type="radio"/> |
| I wouldn't want people to know when my child uses their phone during the night | <input type="radio"/> | <input type="radio"/> | <input type="radio"/> | <input type="radio"/> | <input type="radio"/> |
| My child doesn't use their phone at night, so the measure won't be accurate    | <input type="radio"/> | <input type="radio"/> | <input type="radio"/> | <input type="radio"/> | <input type="radio"/> |
| I don't feel comfortable with my child's doctor having this information        | <input type="radio"/> | <input type="radio"/> | <input type="radio"/> | <input type="radio"/> | <input type="radio"/> |

4.2. Do you have any other concerns that were not previously listed?  Yes  No

4.3. Please specify your other concern(s): \_\_\_\_\_

4.4. How strong is this concern?  1: Not concerning at all  2: A little concerning  3: Neutral  4: Concerning  5: Very concerning

5. Is there anything you think would be important for us to measure to understand your child's sleep (screen and light sensors)? (Optional) \_\_\_\_\_

88% Complete

**Location Sensors: GPS**

Please watch the video and fill out the questions below.

---

1. Overall, how useful do you feel the information from this sensor will be in helping us understand how your child is doing?

- 1: Not useful at all  
 2: A little useful  
 3: Somewhat useful  
 4: Useful  
 5: Very useful

---

2. Would you agree to this information being shared with your child's doctor as part of your child's treatment plan?

- Yes  
 No

---

3. Would you agree to this information being shared with researchers for studies related to your child's pain condition?

- Yes  
 No

---

93% Complete

**4. Please indicate your level of agreement with the following concerns about using this sensor in your child's treatment plan and/or clinical research from "Strongly Disagree" to "Strongly Agree."**

|                                                                                                  | Strongly disagree     | Disagree              | Neutral               | Agree                 | Strongly agree        |
|--------------------------------------------------------------------------------------------------|-----------------------|-----------------------|-----------------------|-----------------------|-----------------------|
| I don't think this sensor is useful in treatment                                                 | <input type="radio"/> | <input type="radio"/> | <input type="radio"/> | <input type="radio"/> | <input type="radio"/> |
| When my child leaves home, they don't usually carry their phone with them                        | <input type="radio"/> | <input type="radio"/> | <input type="radio"/> | <input type="radio"/> | <input type="radio"/> |
| I am not comfortable about the clinician knowing where my child spends their time during the day | <input type="radio"/> | <input type="radio"/> | <input type="radio"/> | <input type="radio"/> | <input type="radio"/> |
| I am worried that my child's data might be seen by people other than my child's doctor           | <input type="radio"/> | <input type="radio"/> | <input type="radio"/> | <input type="radio"/> | <input type="radio"/> |
| My child turns their phone off at times during the day, so this measure would not be helpful     | <input type="radio"/> | <input type="radio"/> | <input type="radio"/> | <input type="radio"/> | <input type="radio"/> |

4.2. Do you have any other concerns that were not previously listed?  Yes  No

4.3. Please specify your other concern(s): \_\_\_\_\_

4.4. How strong is this concern?  1: Not concerning at all  2: A little concerning  3: Neutral  4: Concerning  5: Very concerning

5. If we use your child's GPS data to tell us how much time your child spends at select places of interest, such as home and school and then delete it daily, would you feel comfortable about having this information used in your child's health care?  Yes  No

6. If your child's phone was to provide transformed GPS data, which would not show exactly where your child is but could let us know how much time they spend at various locations during the day and how much they move around, would you feel comfortable about having this information used in your child's health care?  Yes  No

7. Is there anything you think would be important for us to measure to understand your child's location (GPS sensor)? (Optional) \_\_\_\_\_

100% Complete
